# Supplementary material
Source: Springer Nature journal article supplement (https://www.springermedizin.de/resource/supplementary/12879_2013_2755_MOESM1_ESM.pdf/9445320)
Supplement: MOESM1 [file 9445320]

Infection rates / 1000 CVC days

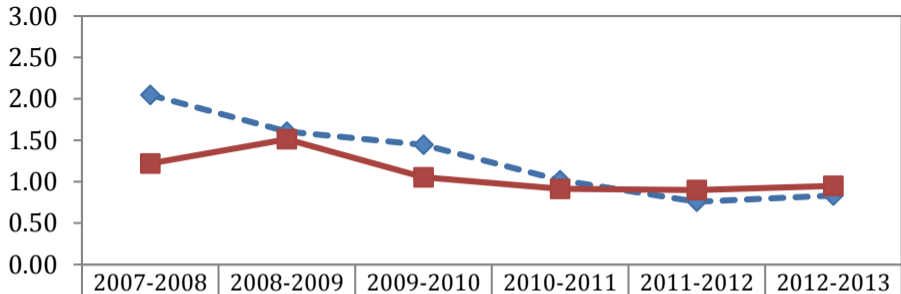

|                    |      |      |      |      |      |      |
|--------------------|------|------|------|------|------|------|
| —◆— Monitoring     | 2.05 | 1.60 | 1.44 | 1.02 | 0.76 | 0.83 |
| 95% bottom CI      | 1.57 | 1.19 | 1.07 | 0.72 | 0.50 | 0.55 |
| 95% upper CI       | 2.61 | 2.11 | 1.91 | 1.40 | 1.10 | 1.20 |
| —■— Non-monitoring | 1.22 | 1.51 | 1.05 | 0.91 | 0.90 | 0.95 |
| 95% bottom CI      | 0.94 | 0.12 | 0.80 | 0.68 | 0.68 | 0.72 |
| 95% upper CI       | 1.55 | 1.88 | 1.35 | 1.19 | 1.18 | 1.23 |

Year of participation
